# Supplementary material for: Fusion pore regulation by cAMP/Epac2 controls cargo release during insulin exocytosis
Source: eLife. 2019 May 20;8:e41711. doi: 10.7554/eLife.41711 (PMC6557626; doi:10.7554/eLife.41711)
Supplement: Figure 7—source data 1. [file elife-41711-fig7-data1.xlsx]

## Sheet: Sheet1
		KO			WT			CON			Epac2 overex
		nofsk	fsk		no fsk	fsk		nofrsk	fsk		no frsk	fsk
	#cells	24	16		23	24		13	15		11	14
	ratio	0.05	0.181818		0.434783	0.66		0.394737	0.546218		0.592593	0.766234
median	lifetime	0.037139	0.394844		0.234944	0.712373		0.266966	0.69735		0.727428	0.717351
	exo freq	0.0143064	0.0103915		0.0264217	0.0369143		0.0151762	0.0512124		0.0124235	0.035016
		18	17		7	15		17	15		19	11
with tolb	ratio	0.1875	0.4		0.818182	0.736842		0.72973	0.788462		0.777778	0.828829
with tolb	lifetime	0.0920335	0.287397		1.68024	1.03962		0.807933	0.865411		1.19916	1.4777
with tolb	exo freq	0.013462	0.0161067		0.0276365	0.0364973		0.0238013	0.0363388		0.0312256	0.0559457
						% increase			% increase
						51.8			38.3754
						203.21			161.213
			-27.3643			39.7124			237.452			181.852
		-0.458536	-0.718496								-0.181379	-0.316258
		-0.512891	-0.558689		0.0459771	-0.0112964		0.568334	-0.29043		0.311928	0.539559
